# Supplementary material for: Selective Constraints on Amino Acids Estimated by a Mechanistic Codon Substitution Model with Multiple Nucleotide Changes
Source: PubMed Central journal article supplement (PMC3060808; doi:10.1371/journal.pone.0017244), 2011-03-18
Supplement: pone.0017244.s005.pdf [file pone.0017244.s005.pdf]

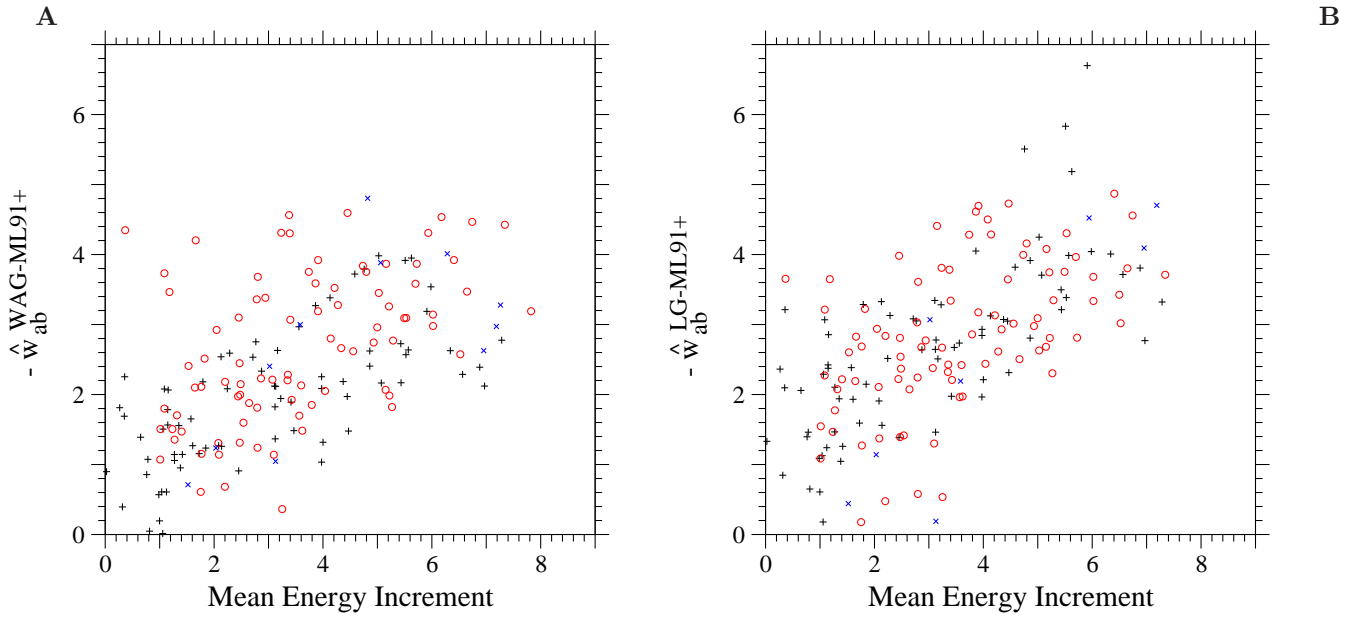

**Figure S3. Selective constraint for each amino acid pair estimated from WAG and from LG.** The ML estimate,  $-\hat{w}_{ab}^{\text{WAG-ML91+}}$  in (A) and  $-\hat{w}_{ab}^{\text{LG-ML91+}}$  in (B), of selective constraint on substitutions of each amino acid pair in the ML-91+ models fitted to the 1-PAM matrices of WAG and LG is plotted against the mean energy increment due to an amino acid substitution,  $(\Delta\hat{\varepsilon}_{ab}^c + \Delta\hat{\varepsilon}_{ab}^v)$  defined by Eqs. S1-4, S1-5, and S1-6. The estimates  $\hat{w}_{ab}$  for the least exchangeable class of multi-step amino acid pairs are not shown. Plus, circle, and cross marks show the values for one-, two-, and three-step amino acid pairs, respectively.
