# Supplementary material for: Selective Constraints on Amino Acids Estimated by a Mechanistic Codon Substitution Model with Multiple Nucleotide Changes
Source: PubMed Central journal article supplement (PMC3060808; doi:10.1371/journal.pone.0017244), 2011-03-18
Supplement: pone.0017244.s011.pdf [file pone.0017244.s011.pdf]

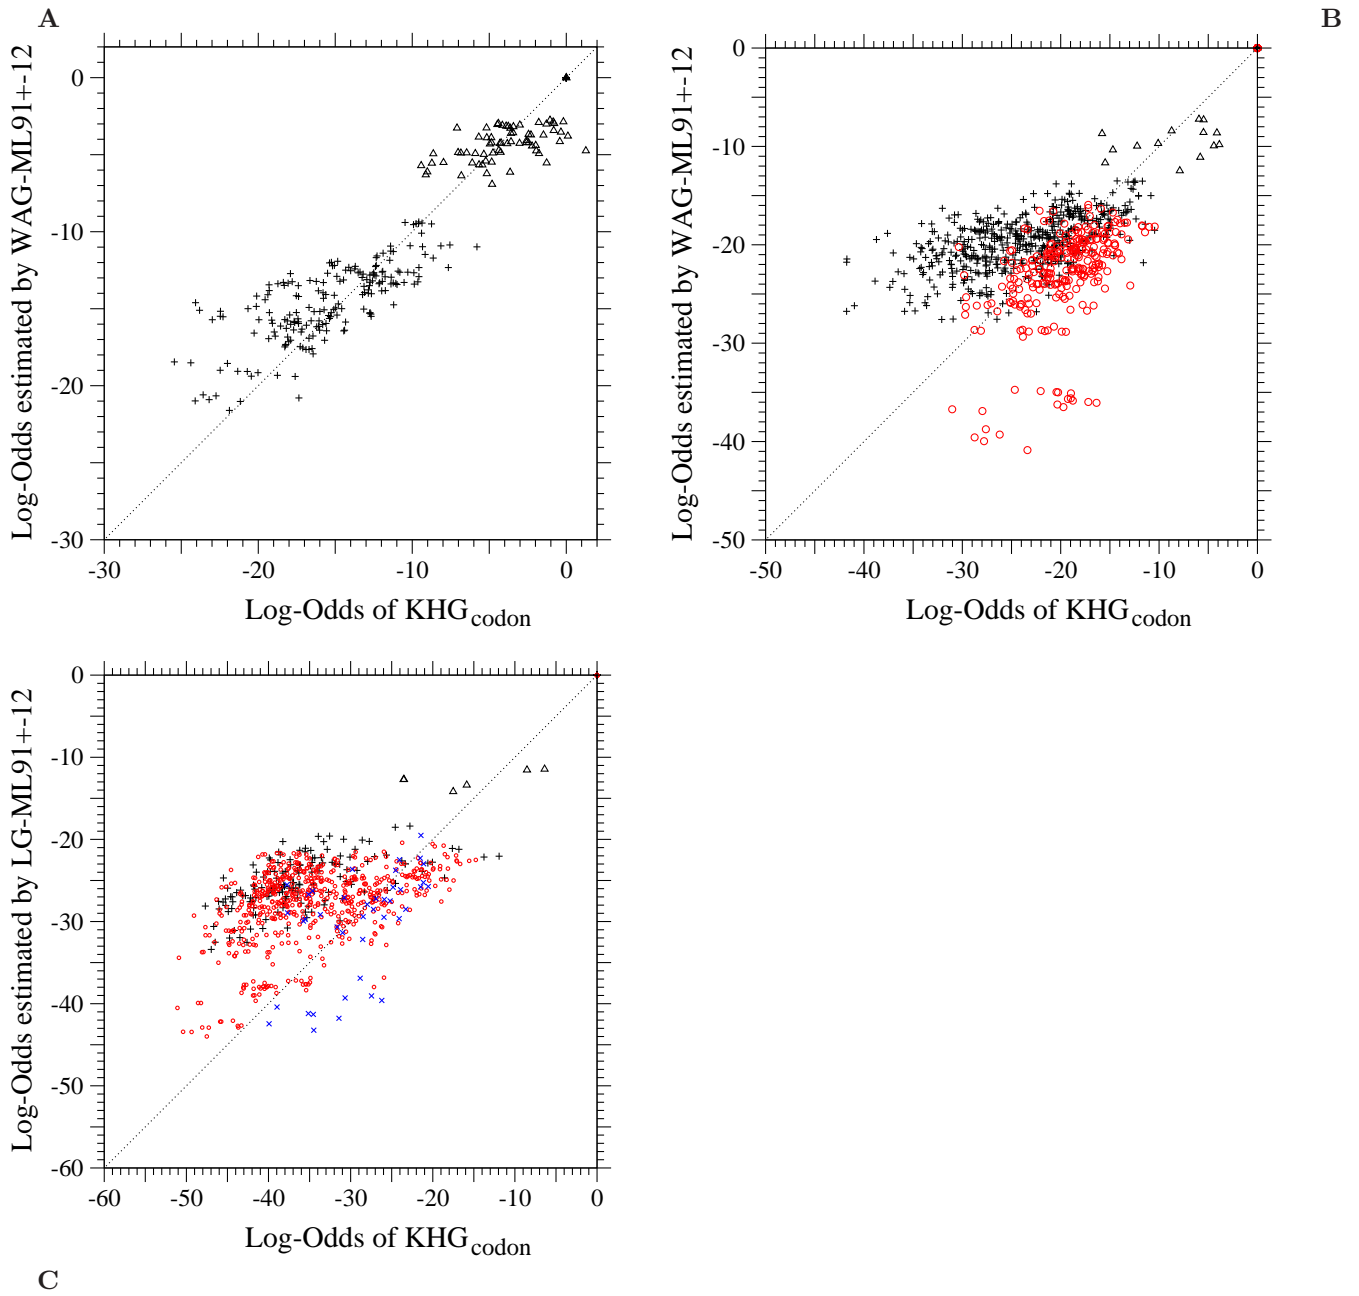

**Figure S9. The WAG-ML91+-12 model fitted to the 1-PAM KHG codon substitution matrix.** Each element  $\log-O(\langle S \rangle(\hat{\tau}, \hat{\sigma}))_{\mu\nu}$  of the log-odds matrix corresponding to (A) single, (B) double, and (C) triple nucleotide changes in the WAG-ML91+-12 model fitted to the 1-PAM KHG codon substitution matrix is plotted against the log-odds  $\log-O(S^{\text{KHG}}(1 \text{ PAM}))_{\mu\nu}$  calculated from KHG. Upper triangle, plus, circle, and cross marks show the log-odds values for synonymous pairs and one-, two-, and three-step amino acid pairs, respectively. The dotted line in each figure shows the line of equal values between the ordinate and the abscissa.
