# Supplementary material for: Selective Constraints on Amino Acids Estimated by a Mechanistic Codon Substitution Model with Multiple Nucleotide Changes
Source: PubMed Central journal article supplement (PMC3060808; doi:10.1371/journal.pone.0017244), 2011-03-18
Supplement: pone.0017244.s013.pdf [file pone.0017244.s013.pdf]

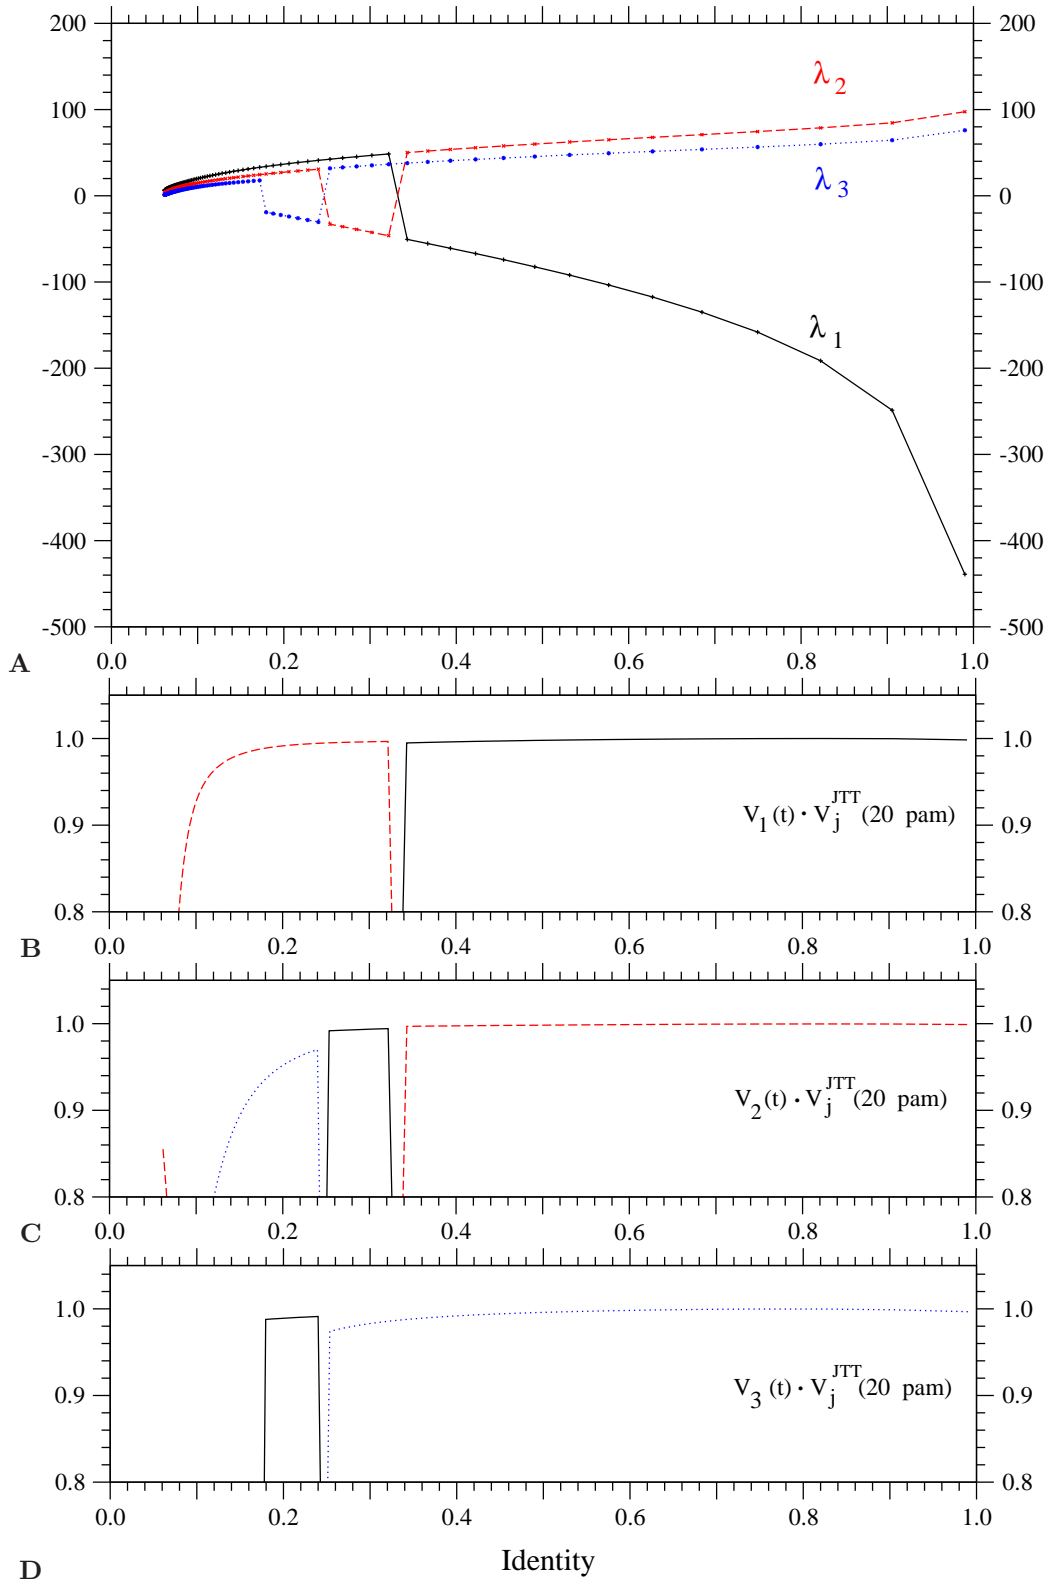

**Figure S11.** Temporal changes of the eigenvalues and the eigenvectors of the log-odds matrix  $\log-O(\langle S \rangle(t))$  calculated by the ML-91+ model fitted to JTT as a function of sequence identity. In (A), the solid, the broken, and the dotted lines show the temporal changes of the first ( $\lambda_1$ ), the second ( $\lambda_2$ ), and the third ( $\lambda_3$ ) principal eigenvalues, respectively. The inner products of the eigenvectors with the eigenvectors of the JTT 20-PAM log-odds matrix,  $V_i(t) \cdot V_j^{JTT}(20\text{-PAM})$ , are shown in (B) for the first principal eigenvector ( $i = 1$ ), in (C) for the second principal eigenvector ( $i = 2$ ), and in (D) for the third principal eigenvector ( $i = 3$ ), by solid lines for  $j = 1$ , by broken lines for  $j = 2$ , and by dotted lines for  $j = 3$ .
