# Supplementary material for: Selective Constraints on Amino Acids Estimated by a Mechanistic Codon Substitution Model with Multiple Nucleotide Changes
Source: PubMed Central journal article supplement (PMC3060808; doi:10.1371/journal.pone.0017244), 2011-03-18
Supplement: pone.0017244.s014.pdf [file pone.0017244.s014.pdf]

**Table S1.** ML estimates of the present models without selective constraints on amino acids for the 1-PAM substitution matrices of JTT, WAG, cpREV, and mtREV.

| id no. | parameter                                                        | JTT                          |                 | WAG                          |              | cpREV                        |              | mtREV                        |              |
|--------|------------------------------------------------------------------|------------------------------|-----------------|------------------------------|--------------|------------------------------|--------------|------------------------------|--------------|
|        |                                                                  | No-Constraints- <sup>a</sup> |                 | No-Constraints- <sup>a</sup> |              | No-Constraints- <sup>a</sup> |              | No-Constraints- <sup>a</sup> |              |
|        |                                                                  | 1                            | 10              | 1                            | 10           | 1                            | 10           | 1                            | 10           |
| 0      | $-\hat{w}_0$                                                     | (0.0)                        | (0.0)           | (0.0)                        | (0.0)        | (0.0)                        | (0.0)        | (0.0)                        | (0.0)        |
| 1      | $1/\hat{\beta}$                                                  | ( $\infty$ )                 | ( $\infty$ )    | ( $\infty$ )                 | ( $\infty$ ) | ( $\infty$ )                 | ( $\infty$ ) | ( $\infty$ )                 | ( $\infty$ ) |
| 2      | $\hat{m}_{[tc][ag]}$                                             | ( $\rightarrow 0$ )          | $\rightarrow 0$ | ( $\rightarrow 0$ )          | 0.279        | ( $\rightarrow 0$ )          | 0.0455       | ( $\rightarrow 0$ )          | 0.0405       |
| 3      | $\hat{m}_{tc ag}/\hat{m}_{[tc][ag]}$                             | 2.16                         | 2.20            | 1.61                         | 1.54         | 2.17                         | 2.62         | 2.32                         | 3.24         |
| 4      | $\hat{m}_{ag}/\hat{m}_{tc ag}$                                   | (1.0)                        | 1.28            | (1.0)                        | 1.36         | (1.0)                        | 1.50         | (1.0)                        | 1.47         |
| 5      | $\hat{m}_{ta}/\hat{m}_{[tc][ag]}$                                | (1.0)                        | 0.629           | (1.0)                        | 0.687        | (1.0)                        | 0.480        | (1.0)                        | 0.595        |
| 6      | $\hat{m}_{tg}/\hat{m}_{[tc][ag]}$                                | (1.0)                        | 0.708           | (1.0)                        | 0.622        | (1.0)                        | 0.775        | (1.0)                        | 0.373        |
| 7      | $\hat{m}_{ca}/\hat{m}_{[tc][ag]}$                                | (1.0)                        | 1.28            | (1.0)                        | 1.45         | (1.0)                        | 1.64         | (1.0)                        | 1.96         |
| 8      | $\hat{f}_{t+a}^{\text{mut}}$                                     | (0.5)                        | 0.495           | (0.5)                        | 0.401        | (0.5)                        | 0.279        | (0.5)                        | 0.226        |
| 9      | $\hat{f}_t^{\text{mut}}/\hat{f}_{t+a}^{\text{mut}}$              | (0.5)                        | 0.486           | (0.5)                        | 0.503        | (0.5)                        | 0.563        | (0.5)                        | 0.583        |
| 10     | $\hat{f}_c^{\text{mut}}/\hat{f}_{c+g}^{\text{mut}}$              | (0.5)                        | 0.335           | (0.5)                        | 0.354        | (0.5)                        | 0.306        | (0.5)                        | 0.223        |
| 14     | $\hat{\sigma}$                                                   | ( $\rightarrow 0$ )          | 1.76            | ( $\rightarrow 0$ )          | 1.58         | ( $\rightarrow 0$ )          | 2.96         | ( $\rightarrow 0$ )          | 2.46         |
|        | $\hat{\tau}\hat{\sigma}$                                         | 0.0137                       | 0.0228          | 0.0136                       | 0.0206       | 0.0139                       | 0.0296       | 0.0149                       | 0.0296       |
|        | #parameters                                                      | 21                           | 30              | 21                           | 30           | 21                           | 30           | 21                           | 30           |
|        | $\hat{I}_{KL}(\hat{\theta}) \times 10^8$ <sup>b</sup>            | 729533                       | 207260          | 1156393                      | 233841       | 1014962                      | 249448       | 945289                       | 305500       |
|        | $\Delta\text{AIC}$ <sup>c</sup>                                  | 86428.1                      | 24595.5         | 37917.6                      | 7719.1       | 3478.0                       | 904.5        | 2644.1                       | 901.0        |
|        | Ratio of substitution rates per codon                            |                              |                 |                              |              |                              |              |                              |              |
|        | the total base/codon                                             | 1.0                          | 1.30            | 1.0                          | 1.47         | 1.0                          | 1.40         | 1.0                          | 1.35         |
|        | transition/transversion                                          | 1.13                         | 1.00            | 0.848                        | 0.752        | 1.11                         | 1.02         | 1.24                         | 1.10         |
|        | nonsynonymous/synonymous <sup>d</sup>                            | 2.75                         | 4.15            | 2.84                         | 5.77         | 2.60                         | 4.91         | 2.09                         | 3.30         |
|        | Ratio of substitution rates per codon for $\sigma \rightarrow 0$ |                              |                 |                              |              |                              |              |                              |              |
|        | the total base/codon                                             | 1.0                          | 1.0             | 1.0                          | 1.21         | 1.0                          | 1.04         | 1.0                          | 1.02         |
|        | transition/transversion                                          | 1.13                         | 1.20            | 0.848                        | 0.853        | 1.11                         | 1.43         | 1.24                         | 1.45         |
|        | nonsynonymous/synonymous <sup>d</sup>                            | 2.75                         | 2.83            | 2.84                         | 4.26         | 2.60                         | 3.19         | 2.09                         | 2.08         |

<sup>a</sup> In all models, equal codon usage ( $\hat{f}_t^{\text{usage}} = \hat{f}_a^{\text{usage}} = \hat{f}_c^{\text{usage}} = \hat{f}_g^{\text{usage}} = 0.25$ ) is assumed. If the value of a parameter is parenthesized, the parameter is not variable but fixed to the value specified.

<sup>b</sup>  $\hat{I}_{KL}(\hat{\theta}) = -(\ell(\hat{\theta})/N + 2.98607330)$  for JTT,  $-(\ell(\hat{\theta})/N + 2.97444860)$  for WAG,  $-(\ell(\hat{\theta})/N + 2.95801048)$  for cpREV, and  $-(\ell(\hat{\theta})/N + 2.85313622)$  for mtREV; see text for details.

<sup>c</sup>  $\Delta\text{AIC} \equiv 2N\hat{I}_{KL}(\hat{\theta}) + 2 \times \#\text{parameters}$  with  $N \simeq 5919000$  for JTT,  $N \simeq 1637663$  for WAG,  $N \simeq 169269$  for cpREV and  $N \simeq 137637$  for mtREV; see text for details.

<sup>d</sup> Note that these ratios are not the ratios of the rates per site but per codon; see text for details.
