# Supplementary material for: Selective Constraints on Amino Acids Estimated by a Mechanistic Codon Substitution Model with Multiple Nucleotide Changes
Source: PubMed Central journal article supplement (PMC3060808; doi:10.1371/journal.pone.0017244), 2011-03-18
Supplement: pone.0017244.s015.pdf [file pone.0017244.s015.pdf]

**Table S2.** ML estimates of the present models with the selective constraints based on mean energy increments due to an amino acid substitution (EI) for the 1-PAM substitution matrices of JTT, WAG, cpREV, and mtREV.

|                                                                                   | JTT                 |                    | WAG                 |                    | cpREV               |                    | mtREV               |                    |
|-----------------------------------------------------------------------------------|---------------------|--------------------|---------------------|--------------------|---------------------|--------------------|---------------------|--------------------|
|                                                                                   | EI-10 <sup>a</sup>  | EI-11 <sup>a</sup> | EI-10 <sup>a</sup>  | EI-11 <sup>a</sup> | EI-10 <sup>a</sup>  | EI-11 <sup>a</sup> | EI-10 <sup>a</sup>  | EI-11 <sup>a</sup> |
| $-\hat{w}_0$                                                                      | (0.0)               | (0.0)              | (0.0)               | (0.0)              | (0.0)               | (0.0)              | (0.0)               | (0.0)              |
| $1/\hat{\beta}$                                                                   | 2.50                | 2.60               | 1.78                | 2.14               | 2.15                | 2.26               | 2.14                | 2.29               |
| $\hat{m}_{[tc][ag]}$                                                              | ( $\rightarrow 0$ ) | 0.308              | ( $\rightarrow 0$ ) | 0.916              | ( $\rightarrow 0$ ) | 0.684              | ( $\rightarrow 0$ ) | 0.737              |
| $\hat{m}_{tc ag}/\hat{m}_{[tc][ag]}$                                              | 2.51                | 2.22               | 1.82                | 1.58               | 2.82                | 2.24               | 4.21                | 3.06               |
| $\hat{m}_{ag}/\hat{m}_{[tc][ag]}$                                                 | 1.01                | 1.01               | 1.13                | 1.10               | 1.19                | 1.14               | 1.05                | 1.01               |
| $\hat{m}_{ta}/\hat{m}_{[tc][ag]}$                                                 | 1.02                | 1.07               | 1.26                | 1.22               | 0.992               | 1.14               | 1.48                | 1.44               |
| $\hat{m}_{tg}/\hat{m}_{[tc][ag]}$                                                 | 1.06                | 1.09               | 0.985               | 1.01               | 1.34                | 1.23               | 0.792               | 0.797              |
| $\hat{m}_{ca}/\hat{m}_{[tc][ag]}$                                                 | 0.937               | 0.891              | 1.04                | 0.949              | 0.974               | 0.925              | 1.17                | 1.08               |
| $\hat{f}_{t+a}^{\text{mut}}$                                                      | 0.582               | 0.565              | 0.516               | 0.486              | 0.376               | 0.405              | 0.359               | 0.403              |
| $\hat{f}_t^{\text{mut}}/\hat{f}_{t+a}^{\text{mut}}$                               | 0.522               | 0.525              | 0.603               | 0.575              | 0.647               | 0.642              | 0.671               | 0.646              |
| $\hat{f}_c^{\text{mut}}/\hat{f}_{c+g}^{\text{mut}}$                               | 0.432               | 0.450              | 0.495               | 0.511              | 0.450               | 0.462              | 0.388               | 0.404              |
| $\hat{\sigma}$                                                                    | 3.20                | 0.918              | 11.7                | 0.998              | 7.26                | 0.969              | 5.25                | 0.339              |
| $\hat{\tau}\hat{\sigma}$                                                          | 0.0358              | 0.0217             | 0.0709              | 0.0204             | 0.0558              | 0.0211             | 0.0531              | 0.0185             |
| #parameters                                                                       | 30                  | 31                 | 30                  | 31                 | 30                  | 31                 | 30                  | 31                 |
| $\hat{I}_{KL}(\hat{\theta}) \times 10^8$ <sup>b</sup>                             | 129885              | 126178             | 144772              | 126415             | 180379              | 169548             | 233525              | 222441             |
| $\Delta\text{AIC}$ <sup>c</sup>                                                   | 15435.7             | 14999.0            | 4801.8              | 4202.5             | 670.7               | 636.0              | 702.8               | 674.3              |
| Ratio of substitution rates per codon                                             |                     |                    |                     |                    |                     |                    |                     |                    |
| the total base/codon                                                              | 1.36                | 1.35               | 1.53                | 1.54               | 1.45                | 1.48               | 1.38                | 1.44               |
| transition/transversion                                                           | 1.09                | 1.11               | 0.803               | 0.834              | 1.08                | 1.13               | 1.34                | 1.41               |
| nonsynonymous/synonymous <sup>d</sup>                                             | 2.09                | 2.13               | 2.48                | 2.82               | 2.45                | 2.65               | 1.75                | 1.92               |
| Ratio of substitution rates per codon for $\sigma \rightarrow 0$                  |                     |                    |                     |                    |                     |                    |                     |                    |
| total base/codon                                                                  | 1.0                 | 1.18               | 1.0                 | 1.38               | 1.0                 | 1.31               | 1.0                 | 1.37               |
| transition/transversion                                                           | 1.49                | 1.28               | 1.25                | 0.944              | 1.93                | 1.36               | 2.35                | 1.56               |
| nonsynonymous/synonymous <sup>d</sup>                                             | 1.12                | 1.59               | 0.945               | 2.13               | 1.15                | 1.99               | 0.767               | 1.64               |
| Ratio of substitution rates per codon for $w_{ab} = 0$ and $\sigma \rightarrow 0$ |                     |                    |                     |                    |                     |                    |                     |                    |
| total base/codon                                                                  | 1.0                 | 1.28               | 1.0                 | 1.59               | 1.0                 | 1.48               | 1.0                 | 1.59               |
| transition/transversion                                                           | 1.31                | 1.15               | 0.983               | 0.830              | 1.51                | 1.50               | 2.15                | 1.57               |
| nonsynonymous/synonymous <sup>d</sup>                                             | 2.57                | 3.83               | 2.82                | 6.53               | 2.74                | 1.16               | 1.84                | 4.51               |

<sup>a</sup> In all models, equal codon usage ( $\hat{f}_t^{\text{usage}} = \hat{f}_a^{\text{usage}} = \hat{f}_c^{\text{usage}} = \hat{f}_g^{\text{usage}} = 0.25$ ) is assumed. If the value of a parameter is parenthesized, the parameter is not variable but fixed to the value specified.

<sup>b</sup>  $\hat{I}_{KL}(\hat{\theta}) = -(\ell(\hat{\theta})/N + 2.98607330)$  for JTT,  $-(\ell(\hat{\theta})/N + 2.97444860)$  for WAG,  $-(\ell(\hat{\theta})/N + 2.95801048)$  for cpREV, and  $-(\ell(\hat{\theta})/N + 2.85313622)$  for mtREV; see text for details.

<sup>c</sup>  $\Delta\text{AIC} \equiv 2N\hat{I}_{KL}(\hat{\theta}) + 2 \times \text{\#parameters}$  with  $N \simeq 5919000$  for JTT,  $N \approx 1637663$  for WAG,  $N \approx 169269$  for cpREV, and  $N \approx 137637$  for mtREV; see text for details.

<sup>d</sup> Note that these ratios are not the ratios of the rates per site but per codon; see text for details.
