# Supplementary material for: Selective Constraints on Amino Acids Estimated by a Mechanistic Codon Substitution Model with Multiple Nucleotide Changes
Source: PubMed Central journal article supplement (PMC3060808; doi:10.1371/journal.pone.0017244), 2011-03-18
Supplement: pone.0017244.s016.pdf [file pone.0017244.s016.pdf]

**Table S3.** ML estimates of the present models with the selective constraints based on the Grantham’s and the Miyata’s amino acid distances for the 1-PAM substitution matrices of JTT and WAG.

|                                                       | JTT                    |         |                      |         | WAG                    |        |                      |         |
|-------------------------------------------------------|------------------------|---------|----------------------|---------|------------------------|--------|----------------------|---------|
|                                                       | Grantham- <sup>a</sup> |         | Miyata- <sup>a</sup> |         | Grantham- <sup>a</sup> |        | Miyata- <sup>a</sup> |         |
|                                                       | 10                     | 11      | 10                   | 11      | 10                     | 11     | 10                   | 11      |
| $-\hat{w}_0$                                          | (0.0)                  | (0.0)   | (0.0)                | (0.0)   | (0.0)                  | (0.0)  | (0.0)                | (0.0)   |
| $1/\hat{\beta}$                                       | 82.0                   | 81.9    | 1.71                 | 1.82    | 58.9                   | 65.1   | 1.28                 | 1.59    |
| $\hat{m}_{[tc][ag]}$                                  | ( $\rightarrow 0$ )    | 0.0392  | ( $\rightarrow 0$ )  | 0.617   | ( $\rightarrow 0$ )    | 0.353  | ( $\rightarrow 0$ )  | 1.33    |
| $\hat{m}_{tc[ag]}/\hat{m}_{[tc][ag]}$                 | 2.12                   | 2.09    | 2.32                 | 1.92    | 1.49                   | 1.44   | 1.64                 | 1.40    |
| $\hat{m}_{ag}/\hat{m}_{[tc][ag]}$                     | 1.08                   | 1.08    | 1.05                 | 1.05    | 1.18                   | 1.17   | 1.15                 | 1.11    |
| $\hat{m}_{ta}/\hat{m}_{[tc][ag]}$                     | 0.864                  | 0.863   | 0.925                | 0.983   | 0.987                  | 0.938  | 1.02                 | 1.02    |
| $\hat{m}_{tg}/\hat{m}_{[tc][ag]}$                     | 0.961                  | 0.983   | 0.922                | 0.985   | 0.816                  | 0.907  | 0.813                | 0.912   |
| $\hat{m}_{ca}/\hat{m}_{[tc][ag]}$                     | 1.16                   | 1.16    | 1.26                 | 1.12    | 1.39                   | 1.32   | 1.55                 | 1.23    |
| $\hat{f}_{t+a}^{\text{mut}}$                          | 0.582                  | 0.581   | 0.574                | 0.543   | 0.528                  | 0.517  | 0.499                | 0.466   |
| $\hat{f}_t^{\text{mut}}/\hat{f}_{t+a}^{\text{mut}}$   | 0.512                  | 0.513   | 0.513                | 0.505   | 0.573                  | 0.562  | 0.575                | 0.531   |
| $\hat{f}_c^{\text{mut}}/\hat{f}_{c+g}^{\text{mut}}$   | 0.384                  | 0.385   | 0.448                | 0.479   | 0.412                  | 0.420  | 0.513                | 0.541   |
| $\hat{\sigma}$                                        | 2.80                   | 2.37    | 2.98                 | 0.00938 | 9.00                   | 2.97   | 9.87                 | 0.00118 |
| $\hat{\tau}\hat{\sigma}$                              | 0.0330                 | 0.0306  | 0.0342               | 0.0147  | 0.0596                 | 0.0317 | 0.0632               | 0.0135  |
| #parameters                                           | 30                     | 31      | 30                   | 31      | 30                     | 31     | 30                   | 31      |
| $\hat{I}_{KL}(\hat{\theta}) \times 10^8$ <sup>b</sup> | 157835                 | 157281  | 138419               | 130721  | 173694                 | 168463 | 154639               | 133347  |
| $\Delta\text{AIC}$ <sup>c</sup>                       | 18744.5                | 18680.9 | 16446.1              | 15536.8 | 5749.0                 | 5579.7 | 5124.9               | 4429.5  |
| Ratio of substitution rates per codon                 |                        |         |                      |         |                        |        |                      |         |
| the total base/the total codon                        | 1.35                   | 1.35    | 1.35                 | 1.34    | 1.51                   | 1.50   | 1.51                 | 1.53    |
| transition/transversion                               | 1.04                   | 1.04    | 1.07                 | 1.10    | 0.768                  | 0.779  | 0.791                | 0.812   |
| nonsynonymous/synonymous <sup>d</sup>                 | 2.21                   | 2.20    | 2.14                 | 2.18    | 2.54                   | 2.65   | 2.53                 | 2.93    |
| Ratio of substitution rates per codon                 |                        |         |                      |         |                        |        |                      |         |
| for $\sigma \rightarrow 0$                            |                        |         |                      |         |                        |        |                      |         |
| the total base/the total codon                        | 1.0                    | 1.02    | 1.0                  | 1.33    | 1.0                    | 1.16   | 1.0                  | 1.53    |
| transition/transversion                               | 1.33                   | 1.31    | 1.42                 | 1.10    | 1.06                   | 0.951  | 1.17                 | 0.813   |
| nonsynonymous/synonymous <sup>d</sup>                 | 1.22                   | 1.28    | 1.17                 | 2.17    | 1.04                   | 1.52   | 1.02                 | 2.93    |
| Ratio of substitution rates per codon                 |                        |         |                      |         |                        |        |                      |         |
| for $w_{ab} = 0$ and $\sigma \rightarrow 0$           |                        |         |                      |         |                        |        |                      |         |
| the total base/the total codon                        | 1.0                    | 1.04    | 1.0                  | 1.48    | 1.0                    | 1.26   | 1.0                  | 1.74    |
| transition/transversion                               | 1.12                   | 1.10    | 1.21                 | 0.990   | 0.803                  | 0.771  | 0.881                | 0.736   |
| nonsynonymous/synonymous <sup>d</sup>                 | 2.67                   | 2.81    | 2.63                 | 5.24    | 2.97                   | 4.20   | 2.92                 | 8.49    |

<sup>a</sup> In all models, equal codon usage ( $\hat{f}_t^{\text{usage}} = \hat{f}_a^{\text{usage}} = \hat{f}_c^{\text{usage}} = \hat{f}_g^{\text{usage}} = 0.25$ ) is assumed. If the value of a parameter is parenthesized, the parameter is not variable but fixed to the value specified.

<sup>b</sup>  $\hat{I}_{KL}(\hat{\theta}) = -(\ell(\hat{\theta})/N + 2.98607330)$  for JTT, and  $-(\ell(\hat{\theta})/N + 2.97444860)$  for WAG; see text for details.

<sup>c</sup>  $\Delta\text{AIC} \equiv 2N\hat{I}_{KL}(\hat{\theta}) + 2 \times \text{\#parameters}$  with  $N = 5919000$  for JTT, and  $N \approx 1637663$  for WAG; see text for details.

<sup>d</sup> Note that these ratios are not the ratios of the rates per site but per codon; see text for details.
